# Supplementary material for: Mrgprb2-mediated mast cell activation exacerbates Modic changes by regulating immune niches
Source: PubMed Central journal article supplement (PMC11148035; doi:10.1038/s12276-024-01230-1), 2024-05-01
Supplement: 12276_2024_1230_MOESM1_ESM.pdf [file 12276_2024_1230_MOESM1_ESM.pdf]

## Supplementary information

Supplementary Table 1

| Gene           | F (5'-3')            | R (5'-3')            |
|----------------|----------------------|----------------------|
| $\beta$ -actin | AGCCATGTACGTAGCCATCC | CTCTCAGCTGTGGTGGTGAA |
| Aggrecan       | TTGCAGACATTGACGAGTGC | TTAGTCCACCCCTCCTCACA |
| Col2           | TGGCTTAGGGCAGAGAGAGA | CGTCGTGCTGTCTCAAGGT  |
| Mmp13          | CTTCTGGCACACGCTTTTCC | ATGGGAAACATCAGGGCTCC |

**Supplementary Table 1. The primer sequences used in the qPCR experiments are provided.**

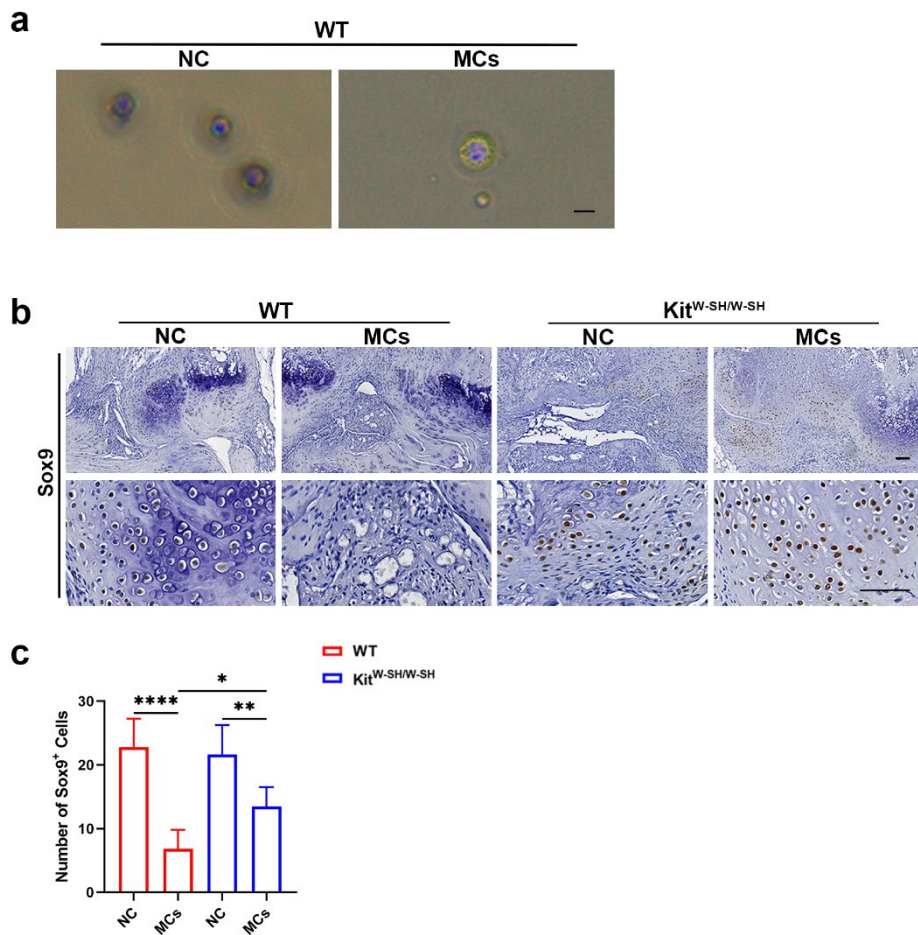

**Supplementary Fig. 1. High-microscopy images of mast cells and immunohistochemistry of Sox9.**

(a). High-microscopy images of mast cells obtained from WT mice stimulated by *C.acnes* in vitro. Scale bar, 10  $\mu$ m.

(b). Immunohistochemistry analysis of Sox9 expression in WT and Kit mice discs with or without Modic changes modeling for 4 weeks. Scale bar, 50  $\mu$ m. Quantitative analysis presented in (c).

(\* $P < 0.05$ , \*\*  $P < 0.01$ , \*\*\* $P < 0.005$ , \*\*\*\* $P < 0.001$ ).

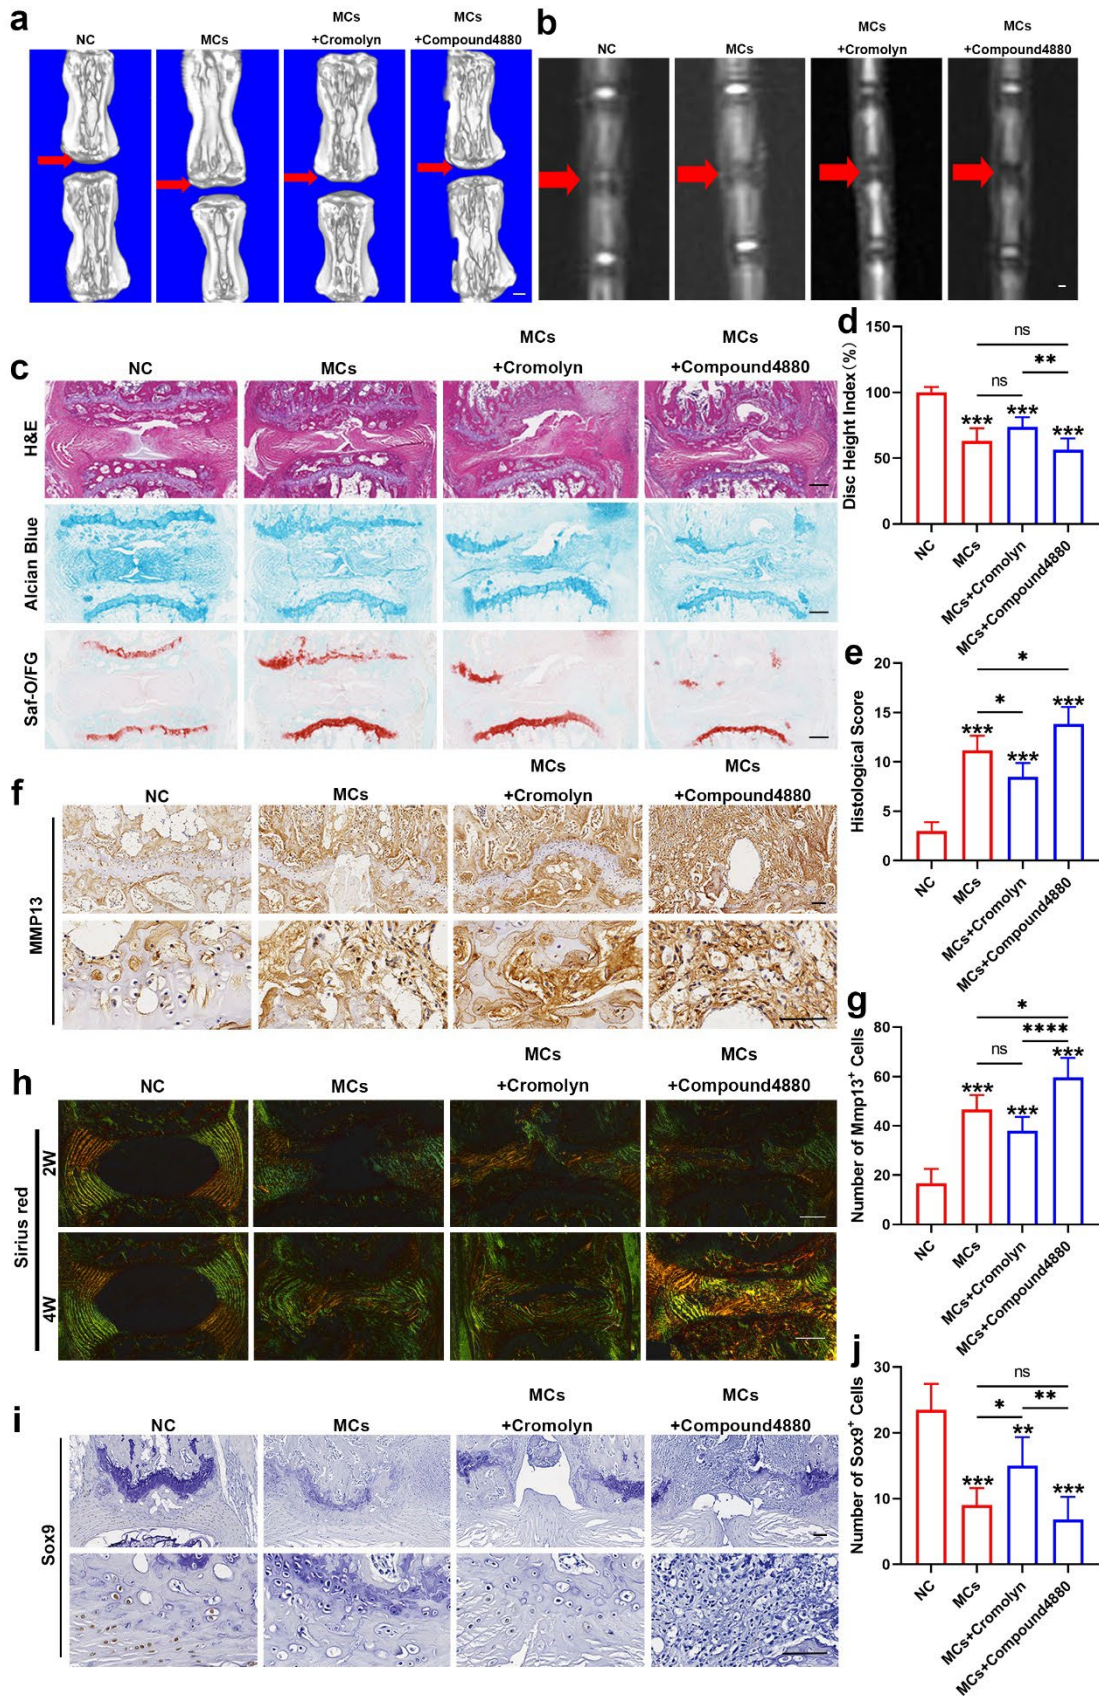

**Supplementary Fig. 2. Data of NC, C.acnes, C.acnes+Cromolyn and C.acnes+Compound4880 groups for 2 weeks.**

(a). 3D reconstruction of micro-CT analysis obtained from the NC, C.acnes, C.acnes+Cromolyn and C.acnes+Compound4880 groups for 2 weeks. Scale bar, 200  $\mu\text{m}$ .

(b). Representative T2-weighted images of caudal discs in WT mice were obtained from the NC, C.acnes, C.acnes+Cromolyn and C.acnes+Compound4880 groups for 2 weeks. Scale bar, 200  $\mu\text{m}$ .

(c). Representative images of H&E, Safranin O/Fast green, and Alcian blue staining from the NC, C.acnes, C.acnes+Cromolyn and C.acnes+Compound4880 groups for 2 weeks. Scale bar, 50  $\mu\text{m}$ .

(d). Disc height index from different groups.

(e). Histological scores from different groups.

(f). Immunohistochemistry analysis of Mmp13 expression in WT mice discs obtained from the NC, C.acnes, C.acnes+Cromolyn and C.acnes+Compound4880 groups for 2 weeks. Quantitative analysis is shown in (g). Scale bar, 50  $\mu\text{m}$ .

(h). Sirius red staining of NC, C.acnes, C.acnes+Cromolyn and C.acnes+Compound4880 groups for 2 weeks and 4 weeks. Scale bar, 50  $\mu\text{m}$ .

(i). Immunohistochemistry analysis of Sox9 expression in WT mice discs obtained from the NC, C.acnes, C.acnes+Cromolyn and C.acnes+Compound4880 groups for 4 weeks. Scale bar, 50  $\mu\text{m}$ . Quantitative analysis is presented in (j).

The results presented in this study are based on data obtained from a minimum of three independent experiments Data are presented as mean $\pm$ SD, the one-way ANOVA with the Tukey's multiple comparison test were used for statistical analysis. (\* $P < 0.05$ , \*\* $P < 0.01$ , \*\*\* $P < 0.005$ , \*\*\*\* $P < 0.001$ ).



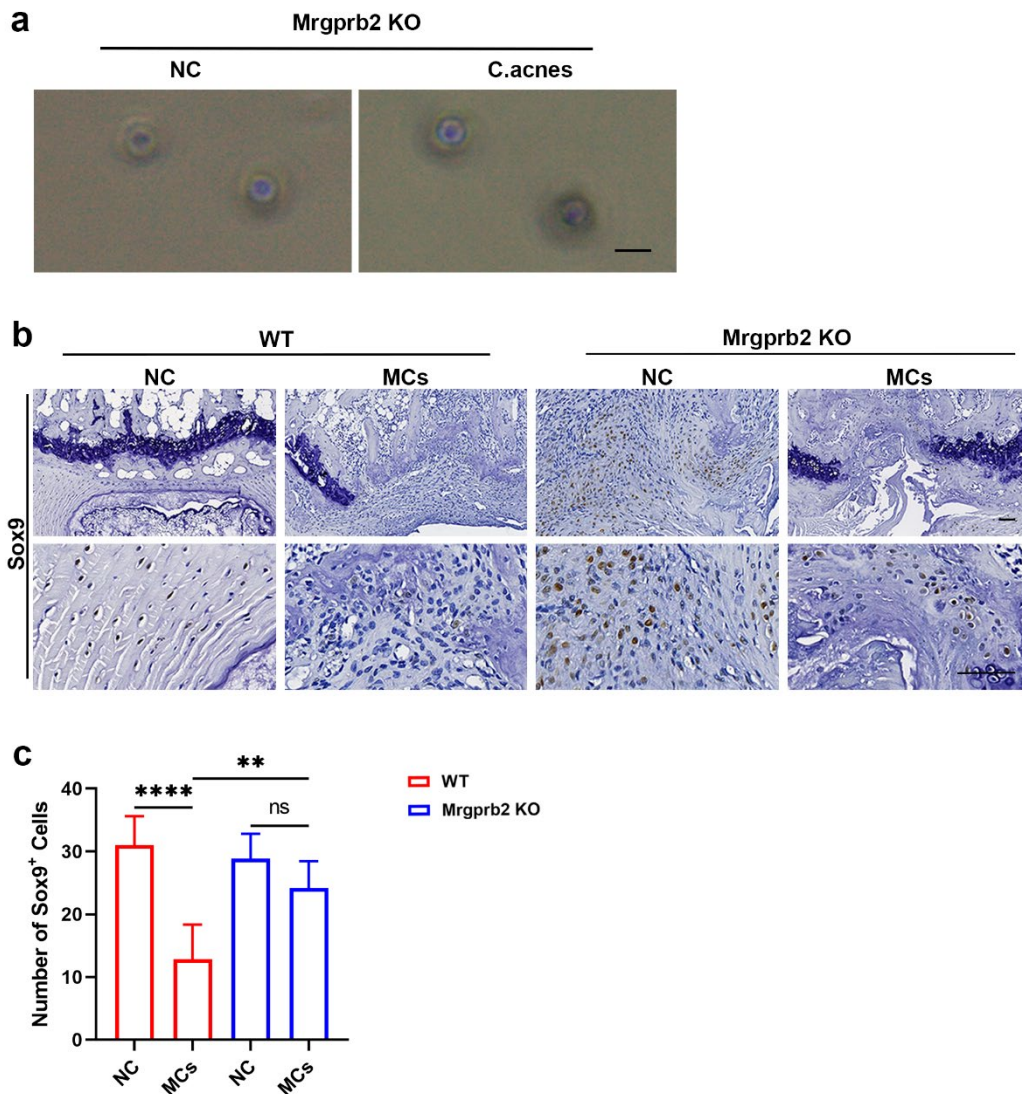

**Supplementary Fig. 3. High-microscopy images of mast cells and immunohistochemistry of Sox9.**

(a). High-microscopy images of mast cells obtained from WT mice stimulated by C.acnes in vitro. Scale bar, 10  $\mu$ m. Scale bar, 50  $\mu$ m.

(b). Immunohistochemistry analysis of Sox9 expression in WT mice discs obtained from WT mice and Mrgprb2 KO mice with or without Modic changes modeling for 4 weeks. Scale bar, 50  $\mu$ m. Quantitative analysis is shown in (c).

The results presented in this study are based on data obtained from a minimum of three independent experiments Data are presented as mean $\pm$ SD, the one-way ANOVA with the Tukey's multiple comparison test were used for statistical analysis. (\*P<0.05, \*\* P<0.01, \*\*\*P<0.005, \*\*\*\* P<0.001).

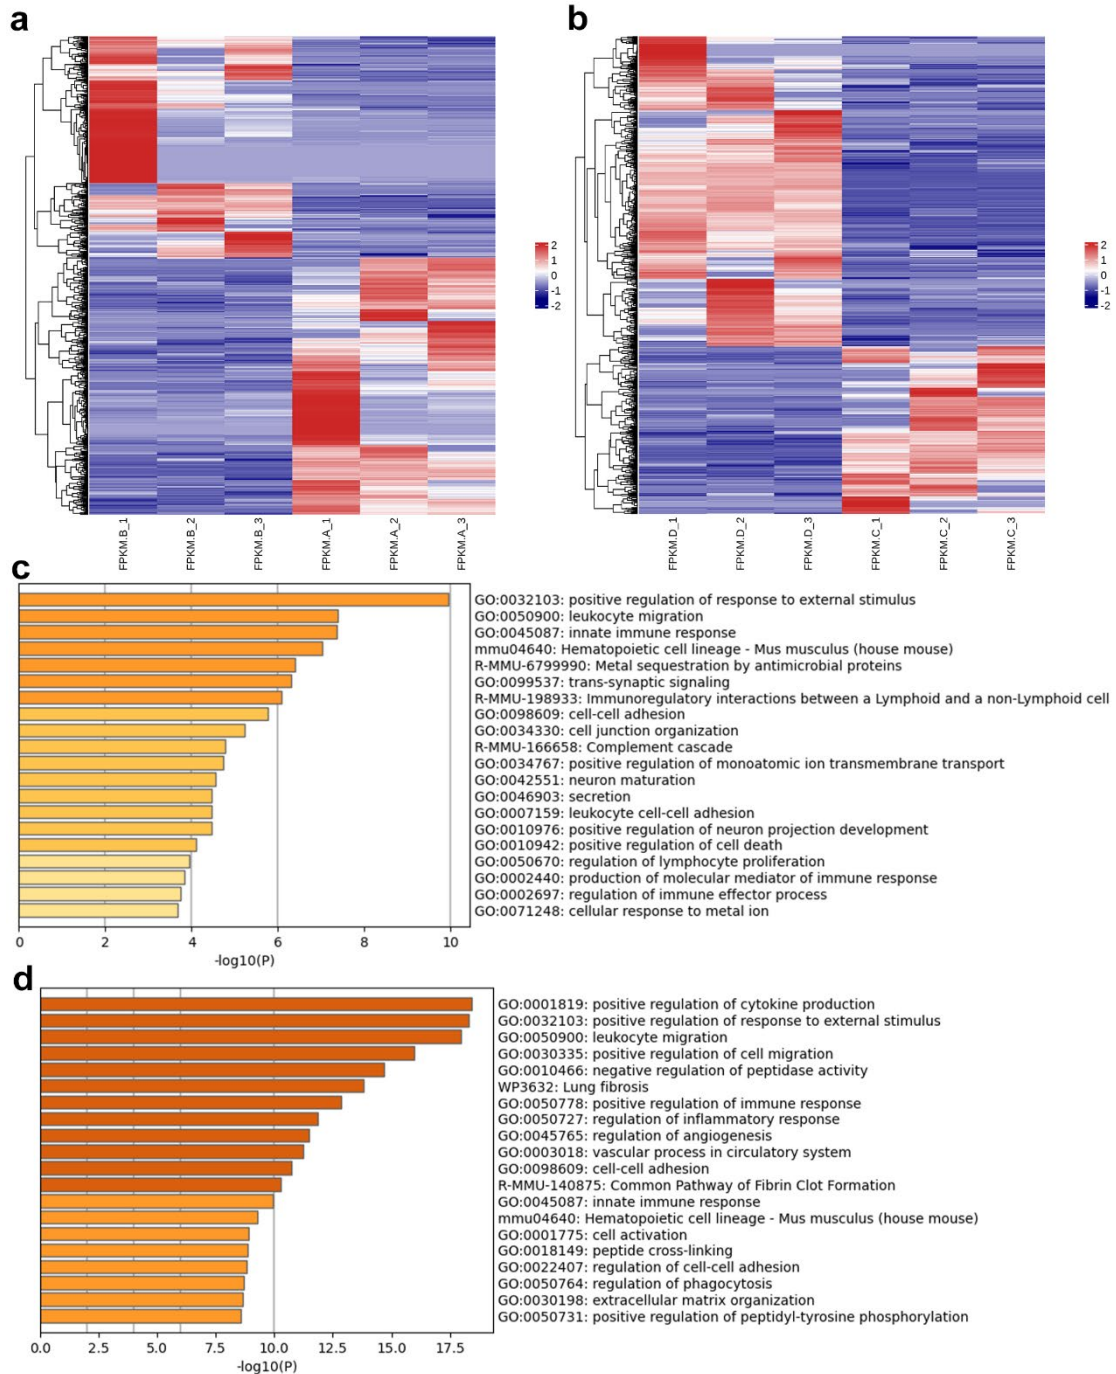

**Supplementary Fig. 4. Transcriptome RNAseq of mast cells from WT and Mrgprb2 KO mice.**

- (a). Heatmap of DEGs of WT mast cells with or without *C.acnes* stimulation.  
 (b). Heatmap of DEGs of Mrgprb2-deficient mast cells with or without *C.acnes* stimulation.  
 (c). GO enrichment heatmap of overall DEGs of WT mast cells with or without *C.acnes* stimulation.  
 (d). GO enrichment heatmap of overall DEGs of Mrgprb2-deficient mast cells with or without *C.acnes* stimulation.

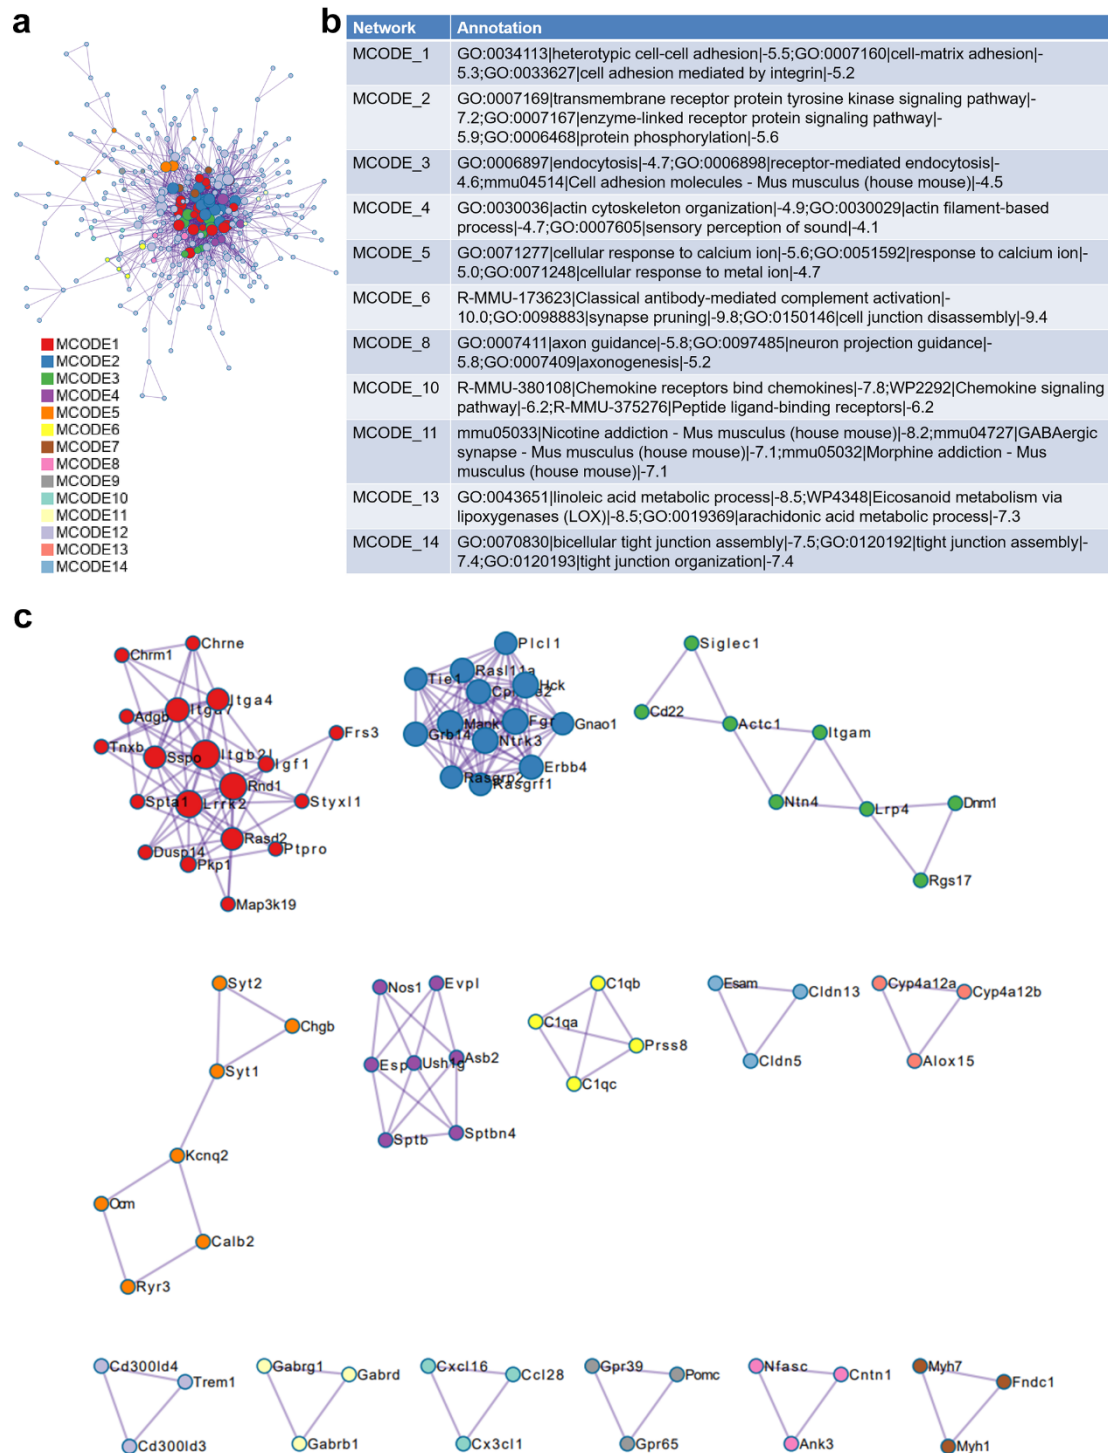

**Supplementary Fig. 5. The protein-protein interaction network (PPI) and MCODE components were analyzed based on the differentially expressed gene lists of WT mast cells.**

- (a). PPI networks of DEGs (WT mast cells stimulated by *C.acnes* vs control)
- (b). The MCODE algorithm was employed to identify highly interconnected network components.
- (c). Clusters were assigned different colors based on their ID, indicating that nodes within the same cluster tend to be in close proximity to each other.

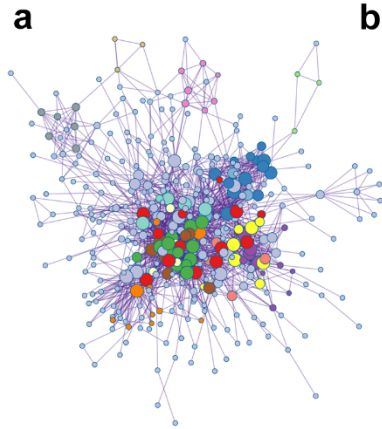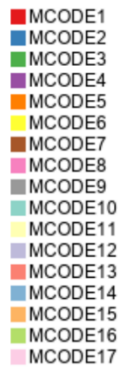

**b**

| Network  | Annotation                                                                                                                                                                                                                                      |
|----------|-------------------------------------------------------------------------------------------------------------------------------------------------------------------------------------------------------------------------------------------------|
| MCODE_1  | R-MMU-1474228 Degradation of the extracellular matrix -12.6;R-MMU-1474244 Extracellular matrix organization -12.3;WP441 Matrix metalloproteinases -11.2                                                                                         |
| MCODE_2  | R-MMU-380108 Chemokine receptors bind chemokines -34.3;R-MMU-375276 Peptide ligand-binding receptors -26.9;R-MMU-418594 G alpha (i) signalling events -24.6                                                                                     |
| MCODE_3  | GO:0043087 regulation of GTPase activity -5.9;mmu04360 Axon guidance - Mus musculus (house mouse) -5.4;mmu04015 Rap1 signaling pathway - Mus musculus (house mouse) -5.2                                                                        |
| MCODE_4  | R-MMU-2173782 Binding and Uptake of Ligands by Scavenger Receptors -6.4;R-MMU-5653656 Vesicle-mediated transport -2.7                                                                                                                           |
| MCODE_5  | GO:0061760 antifungal innate immune response -10.3;mmu04625 C-type lectin receptor signaling pathway - Mus musculus (house mouse) -9.0;R-MMU-5621480 Dectin-2 family -8.4                                                                       |
| MCODE_6  | mmu04610 Complement and coagulation cascades - Mus musculus (house mouse) -12.7;R-MMU-109582 Hemostasis -10.5;WP460 Blood clotting cascade -10.4                                                                                                |
| MCODE_7  | WP85 Focal adhesion -6.4;mmu04510 Focal adhesion - Mus musculus (house mouse) -6.2;WP2841 Focal adhesion: PI3K-Akt-mTOR signaling pathway -5.5                                                                                                  |
| MCODE_8  | R-MMU-3214858 RMTs methylate histone arginines -11.1;R-MMU-212300 PRC2 methylates histones and DNA -10.9;R-MMU-8936459 RUNX1 regulates genes involved in megakaryocyte differentiation and platelet function -10.8                              |
| MCODE_9  | mmu00982 Drug metabolism - cytochrome P450 - Mus musculus (house mouse) -8.7;mmu00980 Metabolism of xenobiotics by cytochrome P450 - Mus musculus (house mouse) -8.7;mmu00983 Drug metabolism - other enzymes - Mus musculus (house mouse) -8.3 |
| MCODE_10 | mmu05140 Leishmaniasis - Mus musculus (house mouse) -6.5;GO:0007249 I-kappaB kinase/NF-kappaB signaling -6.4;mmu05142 Chagas disease - Mus musculus (house mouse) -5.9                                                                          |
| MCODE_11 | R-MMU-388841 Costimulation by the CD28 family -10.3;GO:0045061 thymic T cell selection -8.2;GO:0045058 T cell selection -7.2                                                                                                                    |
| MCODE_12 | R-MMU-190861 Gap junction assembly -11.4;R-MMU-190828 Gap junction trafficking -10.9;R-MMU-157858 Gap junction trafficking and regulation -10.8                                                                                                 |
| MCODE_13 | mmu04610 Complement and coagulation cascades - Mus musculus (house mouse) -9.4;GO:0031639 plasminogen activation -9.2;GO:0034116 positive regulation of heterotypic cell-cell adhesion -9.0                                                     |
| MCODE_15 | mmu00230 Purine metabolism - Mus musculus (house mouse) -6.6;WP2185 Purine metabolism -6.3                                                                                                                                                      |
| MCODE_16 | R-MMU-419812 Calcitonin-like ligand receptors -10.3;R-MMU-373080 Class B/2 (Secretin family receptors)-7.7;GO:0007189 adenylate cyclase-activating G protein-coupled receptor signaling pathway -6.6                                            |

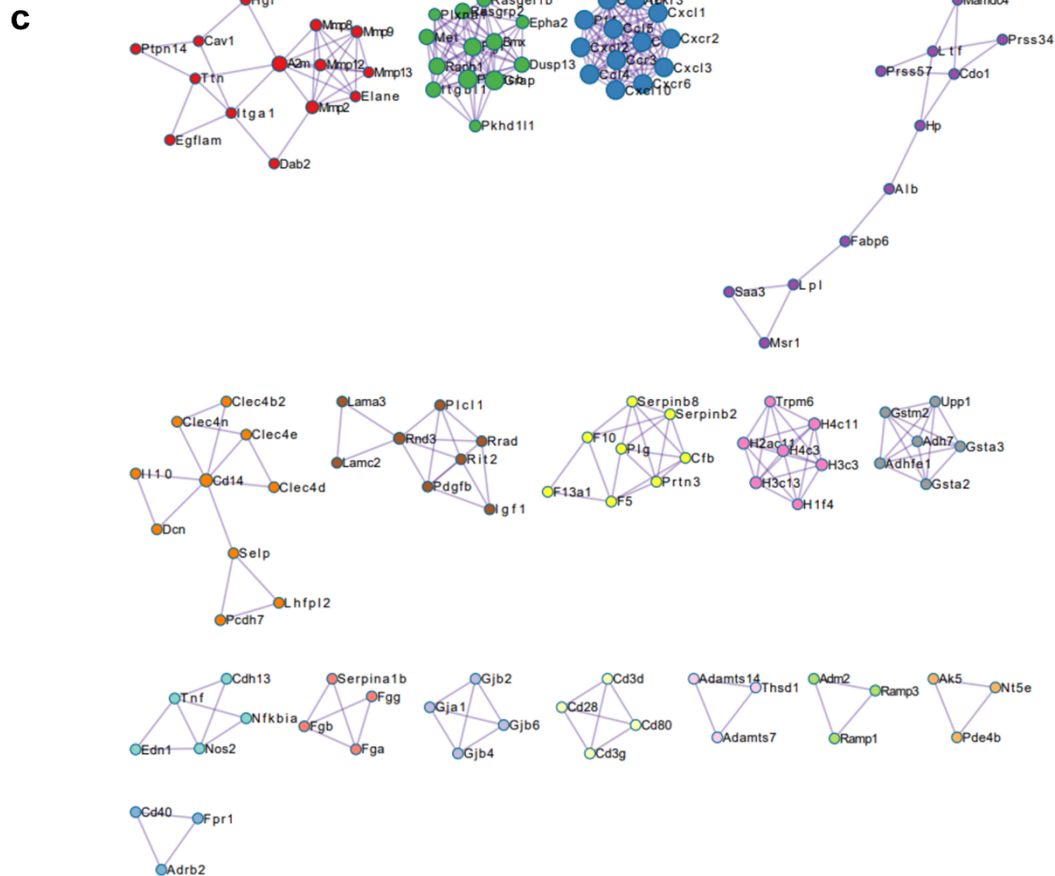



**Supplementary Fig. 6. The protein-protein interaction network (PPI) and MCODE components were analyzed based on the differentially expressed gene lists of Mrgprb2 KO mast cells.**

- (a). PPI networks of DEGs (Mrgprb2 KO mast cells stimulated by *C.acnes* vs control)
- (b). MCODEs has been applied to identify densely connected network components
- (c). Clusters were assigned different colors based on their ID, indicating that nodes within the same cluster tend to be in close proximity to each other.

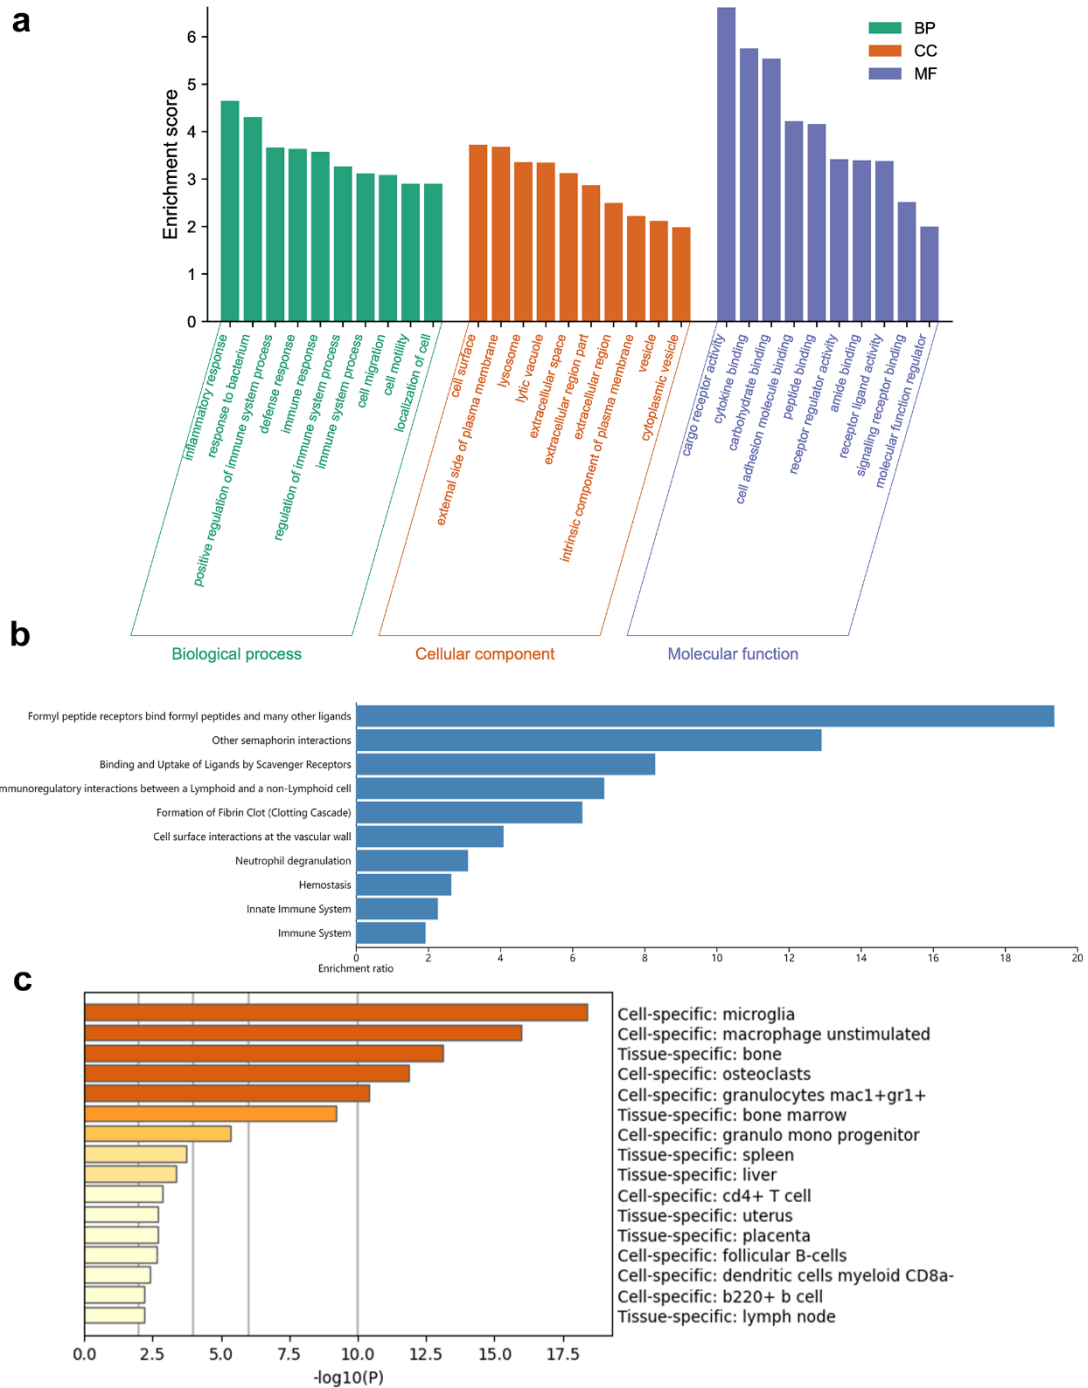

**Supplementary Fig. 7. Transcriptome RNAseq of mast cells from WT and Mrgprb2 KO mice.**

- GO enrichment analysis was performed to assess the functional enrichment of upregulated DEGs.
- KEGG enrichment analysis was conducted to examine the enriched pathways among upregulated DEGs.
- A summary of enrichment analysis in PaGenBase was generated to investigate the gene regulatory networks related to upregulated DEGs.

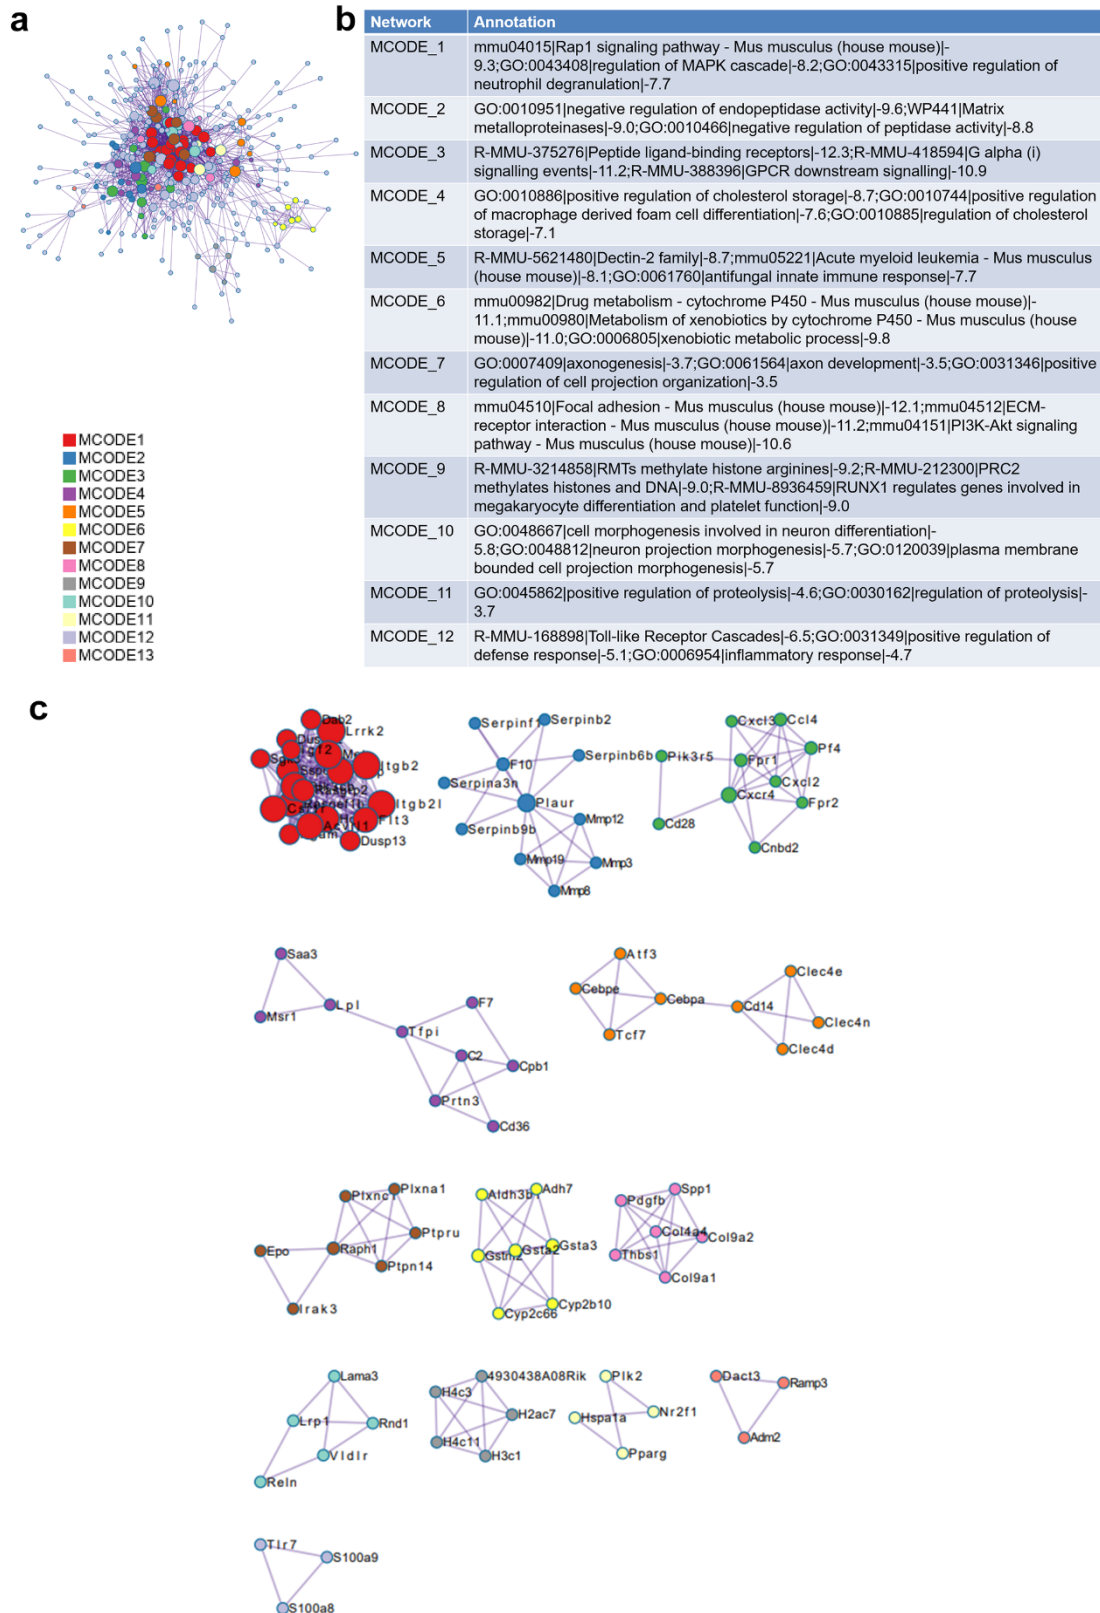

**Supplementary Fig. 8. The protein-protein interaction network (PPI) and MCODE components were analyzed based on the differentially expressed gene lists of WT mast cells and Mrgprb2 KO cells stimulated by *C.acnes*.**

(a). PPI networks of DEGs (WT mast cells stimulated by *C.acnes* vs Mrgprb2 KO mast

cells stimulated by C.acnes)

(b). The MCODE algorithm was employed to identify highly interconnected network components.

(c). Clusters were assigned different colors based on their ID, indicating that nodes within the same cluster tend to be in close proximity to each other.



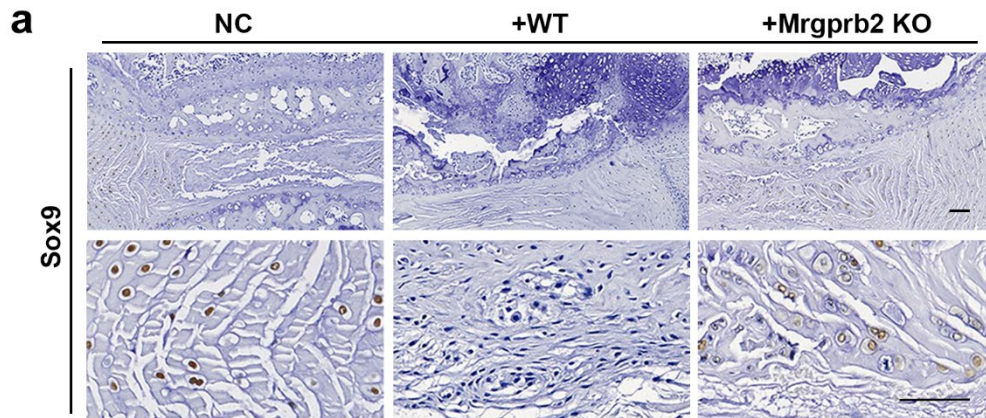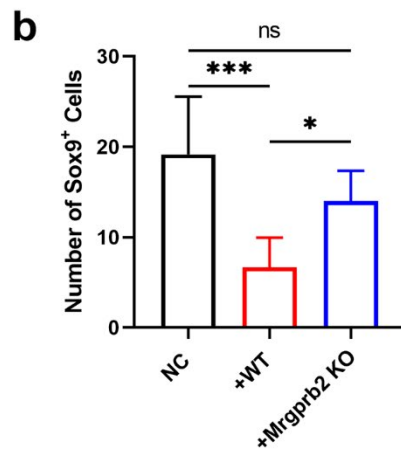

### Supplementary Fig. 9. Immunohistochemistry of Sox9.

(a). Immunohistochemistry analysis of Sox9 expression in Kit mice were obtained from the NC, WT mast cells refusion, Mrgpeb2 KO mast cells refusion for 4 weeks. Scale bar, 50  $\mu$ m. Quantitative analysis is presented in (b).

The presented results were obtained from a minimum of three independent experiments and are presented as the mean  $\pm$  SD. Statistical significance was indicated as \* $P < 0.05$ , \*\* $P < 0.01$ , \*\*\* $P < 0.005$ , and \*\*\*\* $P < 0.001$ .
